# Supplementary material for: Matched cohort study of germline BRCA mutation carriers with triple negative breast cancer in brightness
Source: PubMed Central journal article supplement (PMC8586340; doi:10.1038/s41523-021-00349-y), 2021-11-11
Supplement: 41523_2021_349_MOESM1_ESM.pdf [file 41523_2021_349_MOESM1_ESM.pdf]

## **Supplementary Data**

### **Matched Cohort Study of Germline BRCA Mutation Carriers with Triple-Negative Breast Cancer in BrighTNess Trial**

Supplementary Figures: 1

Supplementary Tables: 4

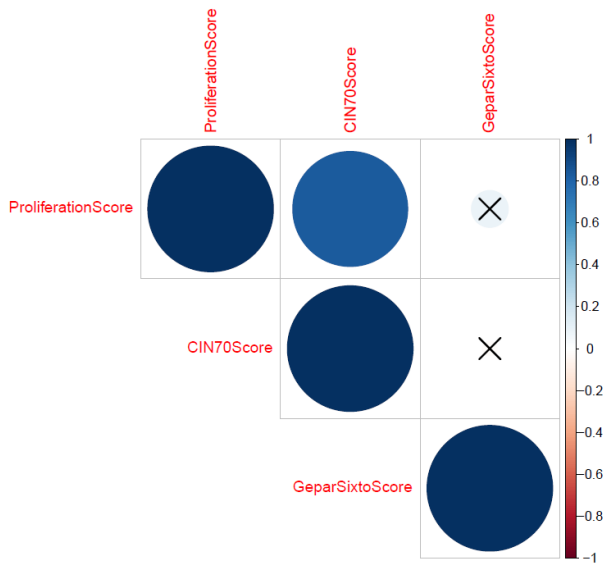

**Supplementary Figure 1. Correlation plot for proliferation, CIN70, and GeparSixto scores.** Size of circle and darkness of color indicate magnitude of Pearson's  $r$ . Blue indicates a positive correlation and red indicates a negative correlation. Non-significant correlations are indicated with an "x".

**Supplementary Table 1. *BRCA* status stratified analyses of pathologic complete response by treatment.**

|       | Germline BRCA mutated (gBRCA) |      | Non-gBRCA |      |
|-------|-------------------------------|------|-----------|------|
|       | N                             | %    | N         | %    |
| Arm A | 24/39                         | 61.5 | 47/78     | 60.3 |
| Arm B | 9/18                          | 50.0 | 23/36     | 63.9 |
| Arm C | 8/18                          | 44.4 | 9/36      | 25.0 |

**Supplementary Table 2. *BRCA* status stratified analyses of pathologic complete response by treatment.**

|             | Germline BRCA mutated (gBRCA) |                         |         | Non-gBRCA  |                         |         |
|-------------|-------------------------------|-------------------------|---------|------------|-------------------------|---------|
|             | Odds Ratio                    | 95% Confidence Interval | p-value | Odds Ratio | 95% Confidence Interval | p-value |
| Arm A vs. C | 2.0                           | (0.65,6.2)              | 0.23    | 4.5        | (1.9,11.0)              | 0.0007  |
| Arm B vs. C | 1.3                           | (0.34,4.6)              | 0.74    | 5.3        | (1.9,14.7)              | 0.001   |

**Supplementary Table 3. Single Sample Hallmark Gene Set Enrichment Analysis of Germline BRCA Mutated Cases versus Matched Controls**

| <b>Signature</b>                           | <b>T.test_Pvalue</b> | <b>FDR_Pvalue</b> |
|--------------------------------------------|----------------------|-------------------|
| HALLMARK_WNT_BETA_CATENIN_SIGNALING        | 0.032812987          | 0.885565934       |
| HALLMARK_PROTEIN_SECRETION                 | 0.129824967          | 0.885565934       |
| HALLMARK_ALLOGRAFT_REJECTION               | 0.137540348          | 0.885565934       |
| HALLMARK_ESTROGEN_RESPONSE_EARLY           | 0.150629922          | 0.885565934       |
| HALLMARK_GLYCOLYSIS                        | 0.179441125          | 0.885565934       |
| HALLMARK_KRAS_SIGNALING_UP                 | 0.183980092          | 0.885565934       |
| HALLMARK_APICAL_JUNCTION                   | 0.19917611           | 0.885565934       |
| HALLMARK_NOTCH_SIGNALING                   | 0.20454539           | 0.885565934       |
| HALLMARK_COMPLEMENT                        | 0.261703241          | 0.885565934       |
| HALLMARK_DNA_REPAIR                        | 0.265367764          | 0.885565934       |
| HALLMARK_TNFA_SIGNALING_VIA_NFKB           | 0.268393765          | 0.885565934       |
| HALLMARK_UNFOLDED_PROTEIN_RESPONSE         | 0.312149705          | 0.885565934       |
| HALLMARK_INFLAMMATORY_RESPONSE             | 0.314928077          | 0.885565934       |
| HALLMARK_SPERMATOGENESIS                   | 0.324627538          | 0.885565934       |
| HALLMARK_TGF_BETA_SIGNALING                | 0.33856888           | 0.885565934       |
| HALLMARK_APOPTOSIS                         | 0.340159966          | 0.885565934       |
| HALLMARK_ANGIOGENESIS                      | 0.379319253          | 0.885565934       |
| HALLMARK_CHOLESTEROL_HOMEOSTASIS           | 0.389575707          | 0.885565934       |
| HALLMARK_PANCREAS_BETA_CELLS               | 0.415323297          | 0.885565934       |
| HALLMARK_COAGULATION                       | 0.430364402          | 0.885565934       |
| HALLMARK_UV_RESPONSE_DN                    | 0.438149373          | 0.885565934       |
| HALLMARK_EPITHELIAL_MESENCHYMAL_TRANSITION | 0.453465358          | 0.885565934       |
| HALLMARK_HEME_METABOLISM                   | 0.474087948          | 0.885565934       |
| HALLMARK_XENOBIOTIC_METABOLISM             | 0.498728702          | 0.885565934       |
| HALLMARK_BILE_ACID_METABOLISM              | 0.50695935           | 0.885565934       |
| HALLMARK_ESTROGEN_RESPONSE_LATE            | 0.521187964          | 0.885565934       |
| HALLMARK_MYOGENESIS                        | 0.543984314          | 0.885565934       |
| HALLMARK_KRAS_SIGNALING                    | 0.545898788          | 0.885565934       |
| HALLMARK_MTORC1_SIGNALING                  | 0.551413552          | 0.885565934       |
| HALLMARK_ANDROGEN_RESPONSE                 | 0.565042417          | 0.885565934       |
| HALLMARK_PEROXISOME                        | 0.583716397          | 0.885565934       |
| HALLMARK_MYC_TARGETS_V2                    | 0.604203365          | 0.885565934       |
| HALLMARK_E2F_TARGETS                       | 0.616297805          | 0.885565934       |
| HALLMARK_UV_RESPONSE                       | 0.618384249          | 0.885565934       |
| HALLMARK_HEDGEHOG_SIGNALING                | 0.640043188          | 0.885565934       |
| HALLMARK_PI3K_AKT_MTOR_SIGNALING           | 0.64682362           | 0.885565934       |
| HALLMARK_OXIDATIVE_PHOSPHORYLATION         | 0.653270694          | 0.885565934       |
| HALLMARK_INTERFERON_GAMMA_RESPONSE         | 0.675133373          | 0.885565934       |
| HALLMARK_APICAL_SURFACE                    | 0.679193238          | 0.885565934       |
| HALLMARK_KRAS_SIGNALING_DN                 | 0.681204564          | 0.885565934       |
| HALLMARK_IL2_STAT5_SIGNALING               | 0.703781314          | 0.887906098       |
| HALLMARK_FATTY_ACID_METABOLISM             | 0.717154925          | 0.887906098       |
| HALLMARK_P53_PATHWAY                       | 0.746258372          | 0.902451985       |
| HALLMARK_HYPOXIA                           | 0.770993075          | 0.911173634       |
| HALLMARK_G2M_CHECKPOINT                    | 0.824588226          | 0.952857506       |
| HALLMARK_MYC_TARGETS_V1                    | 0.853475994          | 0.96479895        |
| HALLMARK_INTERFERON_ALPHA_RESPONSE         | 0.904727096          | 0.968350969       |
| HALLMARK_MITOTIC_SPINDLE                   | 0.913879961          | 0.968350969       |
| HALLMARK_UV_RESPONSE_UP                    | 0.92300621           | 0.968350969       |
| HALLMARK_REACTIVE_OXIGEN_SPECIES_PATHWAY   | 0.943799376          | 0.968350969       |
| HALLMARK_IL6_JAK_STAT3_SIGNALING           | 0.952125237          | 0.968350969       |
| HALLMARK_ADIPOGENESIS                      | 0.968350969          | 0.968350969       |

**Supplementary Table 4. Single Sample Immune Response In Silico Gene Set Enrichment Analysis of Germline BRCA Mutated Cases versus Matched Controls**

| Signature                                             | T.test_Pvalue | FDR_Pvalue  |
|-------------------------------------------------------|---------------|-------------|
| GSE22886_NEUTROPHIL_VS_DC                             | 0.052923328   | 0.992449816 |
| GSE22886_NAIVE_VS_IGM_MEMORY_BCELL                    | 0.054589297   | 0.992449816 |
| GSE22886_NEUTROPHIL_VS_DC_UP                          | 0.067489042   | 0.992449816 |
| GSE22886_IGG_IGA_MEMORY_BCELL_VS_BM_PLASMA_CELL_UP    | 0.082740987   | 0.992449816 |
| GSE22886_NAIVE_VS_IGM_MEMORY_BCELL_UP                 | 0.084395373   | 0.992449816 |
| GSE22886_IGM_MEMORY_BCELL_VS_BM_PLASMA_CELL_UP        | 0.10910867    | 0.992449816 |
| GSE22886_DAY0_VS_DAY7_MONOCYTE_IN_CULTURE_UP          | 0.11180083    | 0.992449816 |
| GSE22886_NAIVE_CD8_TCELL_VS_NKCELL                    | 0.123627711   | 0.992449816 |
| GSE22886_NAIVE_CD4_TCELL_VS_MONOCYTE_UP               | 0.155678174   | 0.992449816 |
| GSE22886_NAIVE_BCELL_VS_MONOCYTE_DN                   | 0.158466133   | 0.992449816 |
| GSE22886_NAIVE_CD4_TCELL_VS_MONOCYTE_DN               | 0.159572469   | 0.992449816 |
| GSE22886_NAIVE_BCELL_VS_MONOCYTE_UP                   | 0.159743287   | 0.992449816 |
| GSE22886_IGA_VS_IGM_MEMORY_BCELL                      | 0.163567329   | 0.992449816 |
| GSE22886_DC_VS_MONOCYTE_DN                            | 0.163684792   | 0.992449816 |
| GSE22886_IGA_VS_IGM_MEMORY_BCELL_DN                   | 0.169889527   | 0.992449816 |
| GSE22886_DAY0_VS_DAY1_MONOCYTE_IN_CULTURE_DN          | 0.196352045   | 0.992449816 |
| GSE22886_NAIVE_TCELL_VS_MONOCYTE_DN                   | 0.196617726   | 0.992449816 |
| GSE22886_NAIVE_CD8_TCELL_VS_MONOCYTE_DN               | 0.202673149   | 0.992449816 |
| GSE22886_NAIVE_VS_IGM_MEMORY_BCELL_DN                 | 0.208200895   | 0.992449816 |
| GSE22886_DC_VS_MONOCYTE                               | 0.210527101   | 0.992449816 |
| GSE22886_NAIVE_CD8_TCELL_VS_NKCELL_DN                 | 0.213687281   | 0.992449816 |
| GSE22886_IGG_IGA_MEMORY_BCELL_VS_BLOOD_PLASMA_CELL_DN | 0.215485743   | 0.992449816 |
| GSE22886_NAIVE_CD4_TCELL_VS_48H_ACT_TH2_UP            | 0.236004937   | 0.992449816 |
| GSE22886_NAIVE_CD8_TCELL_VS_NKCELL_UP                 | 0.242888831   | 0.992449816 |
| GSE22886_IGM_MEMORY_BCELL_VS_BLOOD_PLASMA_CELL_UP     | 0.258253176   | 0.992449816 |
| GSE22886_TH1_VS_TH2_48H_ACT                           | 0.261509237   | 0.992449816 |
| GSE22886_NAIVE_BCELL_VS_BLOOD_PLASMA_CELL_DN          | 0.266970882   | 0.992449816 |
| GSE22886_IGM_MEMORY_BCELL_VS_BLOOD_PLASMA_CELL_DN     | 0.269544809   | 0.992449816 |
| GSE22886_NAIVE_CD8_TCELL_VS_MEMORY_TCELL_DN           | 0.270795456   | 0.992449816 |
| GSE22886_DAY1_VS_DAY7_MONOCYTE_IN_CULTURE_UP          | 0.27225891    | 0.992449816 |
| GSE22886_IGG_IGA_MEMORY_BCELL_VS_BM_PLASMA_CELL       | 0.276167255   | 0.992449816 |
| GSE22886_NAIVE_CD8_TCELL_VS_DC_DN                     | 0.278824442   | 0.992449816 |
| GSE22886_NAIVE_TCELL_VS_NKCELL                        | 0.290298865   | 0.992449816 |
| GSE22886_NAIVE_BCELL_VS_NEUTROPHIL_DN                 | 0.300482633   | 0.992449816 |
| GSE22886_NAIVE_TCELL_VS_NKCELL_DN                     | 0.301222491   | 0.992449816 |
| GSE22886_CD8_VS_CD4_NAIVE_TCELL                       | 0.305766133   | 0.992449816 |
| GSE22886_IGM_MEMORY_BCELL_VS_BM_PLASMA_CELL           | 0.307041001   | 0.992449816 |
| GSE22886_CD8_VS_CD4_NAIVE_TCELL_DN                    | 0.307268086   | 0.992449816 |
| GSE22886_NAIVE_BCELL_VS_DC_DN                         | 0.309211881   | 0.992449816 |
| GSE22886_TH1_VS_TH2_48H_ACT_DN                        | 0.315130595   | 0.992449816 |
| GSE22886_DAY0_VS_DAY7_MONOCYTE_IN_CULTURE_DN          | 0.321778593   | 0.992449816 |
| GSE22886_NAIVE_BCELL_VS_NEUTROPHIL                    | 0.330739403   | 0.992449816 |
| GSE22886_IGG_IGA_MEMORY_BCELL_VS_BLOOD_PLASMA_CELL_UP | 0.331489827   | 0.992449816 |
| GSE22886_NAIVE_TCELL_VS_DC_DN                         | 0.348013355   | 0.992449816 |
| GSE22886_TH1_VS_TH2_48H_ACT_UP                        | 0.351564905   | 0.992449816 |
| GSE22886_NEUTROPHIL_VS_MONOCYTE_DN                    | 0.365753413   | 0.992449816 |
| GSE22886_IL2_VS_IL15_STIM_NKCELL_DN                   | 0.37124705    | 0.992449816 |
| GSE22886_NAIVE_VS_IGG_IGA_MEMORY_BCELL_DN             | 0.371404648   | 0.992449816 |
| GSE22886_NAIVE_VS_MEMORY_TCELL_DN                     | 0.371950576   | 0.992449816 |
| GSE22886_DAY0_VS_DAY1_MONOCYTE_IN_CULTURE_UP          | 0.374706168   | 0.992449816 |
| GSE22886_UNSTIM_VS_IL2_STIM_NKCELL_UP                 | 0.376114361   | 0.992449816 |
| GSE22886_UNSTIM_VS_STIM_MEMORY_TCELL_UP               | 0.385321281   | 0.992449816 |
| GSE22886_DAY0_VS_DAY7_MONOCYTE_IN_CULTURE             | 0.392327887   | 0.992449816 |
| GSE22886_NAIVE_CD8_TCELL_VS_MONOCYTE_UP               | 0.393498184   | 0.992449816 |
| GSE22886_IL2_VS_IL15_STIM_NKCELL                      | 0.45367746    | 0.992449816 |
| GSE22886_DAY1_VS_DAY7_MONOCYTE_IN_CULTURE             | 0.481577593   | 0.992449816 |
| GSE22886_CD8_VS_CD4_NAIVE_TCELL_UP                    | 0.482146879   | 0.992449816 |
| GSE22886_NAIVE_TCELL_VS_NKCELL_UP                     | 0.485796745   | 0.992449816 |
| GSE22886_TH1_VS_TH2_12H_ACT_DN                        | 0.494942278   | 0.992449816 |
| GSE22886_IGA_VS_IGM_MEMORY_BCELL_UP                   | 0.498654962   | 0.992449816 |
| GSE22886_TH1_VS_TH2_12H_ACT_UP                        | 0.525123151   | 0.992449816 |
| GSE22886_NEUTROPHIL_VS_MONOCYTE                       | 0.533564006   | 0.992449816 |
| GSE22886_UNSTIM_VS_IL2_STIM_NKCELL                    | 0.545351067   | 0.992449816 |
| GSE22886_NAIVE_CD4_TCELL_VS_MEMORY_TCELL_DN           | 0.556298937   | 0.992449816 |
| GSE22886_NAIVE_CD4_TCELL_VS_12H_ACT_TH1_UP            | 0.569691311   | 0.992449816 |
| GSE22886_NAIVE_TCELL_VS_MONOCYTE_UP                   | 0.570420024   | 0.992449816 |
| GSE22886_NAIVE_CD4_TCELL_VS_DC_DN                     | 0.571127765   | 0.992449816 |
| GSE22886_NAIVE_TCELL_VS_DC                            | 0.584264304   | 0.992449816 |
| GSE22886_TCELL_VS_BCELL_NAIVE_UP                      | 0.58536891    | 0.992449816 |
| GSE22886_NAIVE_BCELL_VS_BLOOD_PLASMA_CELL_UP          | 0.593875382   | 0.992449816 |
| GSE22886_NAIVE_CD8_TCELL_VS_DC                        | 0.598457546   | 0.992449816 |
| GSE22886_NAIVE_TCELL_VS_MONOCYTE                      | 0.607512536   | 0.992449816 |
| GSE22886_NAIVE_CD4_TCELL_VS_NKCELL_DN                 | 0.610157911   | 0.992449816 |
| GSE22886_NAIVE_CD4_TCELL_VS_NKCELL_UP                 | 0.617108649   | 0.992449816 |
| GSE22886_DAY0_VS_DAY1_MONOCYTE_IN_CULTURE             | 0.620046659   | 0.992449816 |

**Supplementary Table 4. (cont)**

|                                                    |             |             |
|----------------------------------------------------|-------------|-------------|
| GSE22886 DAY1 VS DAY7 MONOCYTE IN CULTURE DN       | 0.627523773 | 0.992449816 |
| GSE22886 NAIVE VS MEMORY TCELL                     | 0.631563883 | 0.992449816 |
| GSE22886 NAIVE CD8 TCELL VS MEMORY TCELL UP        | 0.63579439  | 0.992449816 |
| GSE22886 NAIVE CD4 TCELL VS 12H ACT TH2 UP         | 0.643180147 | 0.992449816 |
| GSE22886 NAIVE VS IGG IGA MEMORY BCELL             | 0.646914836 | 0.992449816 |
| GSE22886 IL2 VS IL15 STIM NKCELL UP                | 0.669628092 | 0.992449816 |
| GSE22886 NAIVE CD8 TCELL VS MONOCYTE               | 0.673784239 | 0.992449816 |
| GSE22886 CD8 TCELL VS BCELL NAIVE UP               | 0.680313357 | 0.992449816 |
| GSE22886 TH1 VS TH2 12H ACT                        | 0.681063091 | 0.992449816 |
| GSE22886 NEUTROPHIL VS DC DN                       | 0.683949548 | 0.992449816 |
| GSE22886 NAIVE CD4 TCELL VS MEMORY TCELL           | 0.693579173 | 0.992449816 |
| GSE22886 CD8 TCELL VS BCELL NAIVE DN               | 0.699570967 | 0.992449816 |
| GSE22886 NEUTROPHIL VS MONOCYTE UP                 | 0.714083125 | 0.992449816 |
| GSE22886 NAIVE BCELL VS BM PLASMA CELL UP          | 0.715192421 | 0.992449816 |
| GSE22886 NAIVE CD4 TCELL VS 12H ACT TH1 DN         | 0.721106028 | 0.992449816 |
| GSE22886 NAIVE CD4 TCELL VS 48H ACT TH2 DN         | 0.727423558 | 0.992449816 |
| GSE22886 NAIVE BCELL VS BLOOD PLASMA CELL          | 0.731413105 | 0.992449816 |
| GSE22886 NAIVE BCELL VS MONOCYTE                   | 0.731770105 | 0.992449816 |
| GSE22886 NAIVE CD4 TCELL VS NEUTROPHIL DN          | 0.740628765 | 0.992449816 |
| GSE22886 UNSTIM VS IL15 STIM NKCELL UP             | 0.757275457 | 0.992449816 |
| GSE22886 NAIVE CD4 TCELL VS 12H ACT TH2 DN         | 0.765163601 | 0.992449816 |
| GSE22886 CD4 TCELL VS BCELL NAIVE DN               | 0.771227266 | 0.992449816 |
| GSE22886 UNSTIM VS STIM MEMORY TCELL DN            | 0.774770783 | 0.992449816 |
| GSE22886 CD4 TCELL VS BCELL NAIVE UP               | 0.777955657 | 0.992449816 |
| GSE22886 NAIVE CD8 TCELL VS DC UP                  | 0.785145413 | 0.992449816 |
| GSE22886 NAIVE CD4 TCELL VS DC UP                  | 0.79313471  | 0.992449816 |
| GSE22886 UNSTIM VS IL15 STIM NKCELL                | 0.79621323  | 0.992449816 |
| GSE22886 NAIVE CD4 TCELL VS 48H ACT TH2            | 0.800036298 | 0.992449816 |
| GSE22886 IGG IGA MEMORY BCELL VS BM PLASMA CELL DN | 0.801434496 | 0.992449816 |
| GSE22886 NAIVE CD8 TCELL VS MEMORY TCELL           | 0.813146865 | 0.992449816 |
| GSE22886 NAIVE BCELL VS DC                         | 0.815379961 | 0.992449816 |
| GSE22886 UNSTIM VS IL2 STIM NKCELL DN              | 0.815887739 | 0.992449816 |
| GSE22886 NAIVE CD4 TCELL VS NEUTROPHIL             | 0.819524958 | 0.992449816 |
| GSE22886 DC VS MONOCYTE UP                         | 0.824702796 | 0.992449816 |
| GSE22886 CTRL VS LPS 24H DC DN                     | 0.826549419 | 0.992449816 |
| GSE22886 NAIVE CD4 TCELL VS NEUTROPHIL UP          | 0.828791945 | 0.992449816 |
| GSE22886 TCELL VS BCELL NAIVE DN                   | 0.828868233 | 0.992449816 |
| GSE22886 TCELL VS BCELL NAIVE                      | 0.830486634 | 0.992449816 |
| GSE22886 NAIVE CD8 TCELL VS NEUTROPHIL UP          | 0.83478815  | 0.992449816 |
| GSE22886 NAIVE CD8 TCELL VS NEUTROPHIL             | 0.841330774 | 0.992449816 |
| GSE22886 NAIVE VS IGG IGA MEMORY BCELL UP          | 0.841825266 | 0.992449816 |
| GSE22886 UNSTIM VS IL15 STIM NKCELL DN             | 0.845942673 | 0.992449816 |
| GSE22886 NAIVE BCELL VS DC UP                      | 0.854049994 | 0.992449816 |
| GSE22886 CTRL VS LPS 24H DC                        | 0.856014845 | 0.992449816 |
| GSE22886 NAIVE BCELL VS BM PLASMA CELL             | 0.857654173 | 0.992449816 |
| GSE22886 NAIVE CD4 TCELL VS MEMORY TCELL UP        | 0.867467039 | 0.992449816 |
| GSE22886 NAIVE TCELL VS NEUTROPHIL                 | 0.872201142 | 0.992449816 |
| GSE22886 NAIVE CD4 TCELL VS DC                     | 0.887160376 | 0.992449816 |
| GSE22886 CTRL VS LPS 24H DC UP                     | 0.887367677 | 0.992449816 |
| GSE22886 IGM MEMORY BCELL VS BM PLASMA CELL DN     | 0.899821898 | 0.992449816 |
| GSE22886 NAIVE TCELL VS DC UP                      | 0.901902106 | 0.992449816 |
| GSE22886 IGM MEMORY BCELL VS BLOOD PLASMA CELL     | 0.902617    | 0.992449816 |
| GSE22886 NAIVE TCELL VS NEUTROPHIL DN              | 0.902995724 | 0.992449816 |
| GSE22886 IGG IGA MEMORY BCELL VS BLOOD PLASMA CELL | 0.906117199 | 0.992449816 |
| GSE22886 NAIVE TCELL VS NEUTROPHIL UP              | 0.910470695 | 0.992449816 |
| GSE22886 NAIVE CD4 TCELL VS NKCELL                 | 0.912287352 | 0.992449816 |
| GSE22886 NAIVE CD8 TCELL VS NEUTROPHIL DN          | 0.912333886 | 0.992449816 |
| GSE22886 UNSTIM VS STIM MEMORY TCELL               | 0.917427863 | 0.992449816 |
| GSE22886 NAIVE BCELL VS NEUTROPHIL UP              | 0.931295021 | 0.992449816 |
| GSE22886 NAIVE CD4 TCELL VS 48H ACT TH1 UP         | 0.944653849 | 0.992449816 |
| GSE22886 NAIVE CD4 TCELL VS 12H ACT TH1            | 0.96506936  | 0.992449816 |
| GSE22886 NAIVE CD4 TCELL VS MONOCYTE               | 0.970876549 | 0.992449816 |
| GSE22886 NAIVE CD4 TCELL VS 48H ACT TH1            | 0.976378034 | 0.992449816 |
| GSE22886 NAIVE CD4 TCELL VS 12H ACT TH2            | 0.976935003 | 0.992449816 |
| GSE22886 NAIVE VS MEMORY TCELL UP                  | 0.981892419 | 0.992449816 |
| GSE22886 NAIVE BCELL VS BM PLASMA CELL DN          | 0.982458439 | 0.992449816 |
| GSE22886 CD8 TCELL VS BCELL NAIVE                  | 0.989432627 | 0.992449816 |
| GSE22886 CD4 TCELL VS BCELL NAIVE                  | 0.991033676 | 0.992449816 |
| GSE22886 NAIVE CD4 TCELL VS 48H ACT TH1 DN         | 0.992449816 | 0.992449816 |
